# Supplementary material
Source: PubMed Central journal article supplement (PMC2940473)
Supplement: me.2010-0082_1.pdf [file me.2010-0082_1.pdf]

## Supplemental Tables

Supplemental Table 1. Mouse quantitative RT-PCR primers.

|           | <b>Forward Primer</b>    | <b>Reverse Primer</b>     |
|-----------|--------------------------|---------------------------|
| Cyclin A2 | GAGGGCGATCCTTGTGGAT      | CACAGCCAAATGCAGGGTCT      |
| Cyclin B1 | TGGCCTCACAAAGCACATGA     | GCTGTGCCAGCGTGCTAATC      |
| Cyclin B2 | GGCTGGTCCAAGTCCATTCC     | GTCCATGATGCCAATGCACA      |
| Cyclin D1 | TAGGCCCTCAGCCTCACTC      | CCACCCCTGGGATAAAGCAC      |
| Cyclin D2 | AAGCCTGCCAGGAGCAAATC     | ATCCGGCGTTATGCTGCTCT      |
| Cyclin D3 | CCAGCGTGTCTGCAGAGTT      | CCTTTTGCACGCACTGGAAG      |
| Cyclin E1 | CAGAGCAGCGAGCAGGAGC      | GCAGCTGCTTCCACACCACT      |
| Cyclin E2 | TGCTGCCGCCTTATGTCATT     | TCCGAGATGTCATCCCATTCC     |
| Cdk1      | CTGCAGCTCGGAGCACAGTT     | CCAGAACACGGAGGCACTTG      |
| Cdk2      | CTGCCATTCTCACCGTGTCC     | AGCTTGATGGACCCCTCTGC      |
| Cdk4      | CGAGCGTAAGATCCCCTGCT     | GCACCGACACCAATTTGAGC      |
| Cdk6      | TGCGAGTGCAGACCAAGTGG     | AGGTCTCCAGGTGCCTCAGC      |
| FoxM1     | CTCAAGCCGCCTGCTATCCT     | CAGCCCTTGCCTGCTAGCTT      |
| Cks1b     | ACCTCGGCGTTCAGCAGAGT     | TGGCCGTCGGAACAGTAAGA      |
| Skp2      | CAGCTGAACCTCAGCGGCTA     | ATGAGGTTGGGGCATCGTTT      |
| KIS       | GAGGCCCTCGCTTTTCTTCA     | TCCGCACTCCACAGGATGTT      |
| Cks2      | AGTACCGGCATGTCATGTTACCCA | ACTCTGTTGGACACCAAGTCTCCT  |
| Cdc25a    | TTCCCTTTGTTCGAGAGCAG     | AAGGAATGGAAGGCCCAGGT      |
| Cdc25b    | GCGTCCCATCATGCCTTGTA     | GGTCCACGCTCAGACGAGAA      |
| Cdc25c    | AACGCCATTAGATGGAGGAGGAA  | AACTTCCAGACAGCAAAGCAGCC   |
| Survivin  | GCAGCCCATGGGTAAGTGTG     | CCGTTACCCCGTGGTAGGAA      |
| Aurkb     | TCGGGGTGCTCTGCTATGAA     | CCACCTTGACAATCCGACGA      |
| Cdca8     | ACTTTGTGACGCCAGCTATGAGCA | AAACTTGCTCTTTGGCTGCTGGAG  |
| Plk1      | GGTCCGGGAGACAAATGAGG     | TTGGAGGCGTTGACACTGGT      |
| Cdc20     | TGACCGCTTTATCCCCAAC      | CTTCCGGCTGGTTTTCTTG       |
| Cdca2     | TTGCATCGAAGAAGCCACTCCTGA | TGGTAAGCGTCTCTTCCGTTGTGT  |
| Kif20a    | AGACAGCAAGCAGATTCGACAGGA | TCCGACTTTTCACTGTGGACACGTT |
| Nek2      | TGACCGAACCAACACAACCCTGTA | TTCTGTGACACTCTTTCAGGGCCA  |
| Cenpa     | AGTTCTGGCGGTCCTGACG      | CCGCCTTCCCTAAGCCTTCT      |
| Cenpb     | GGAGTCACCACCCAGGCTCT     | GCAGAAGGACCCGACGAGAT      |
| Cenpe     | TCATACACATCGGACGCCACTGAA | ACTCTTTCTTAGCGTCAAGGGCCA  |
| Cenpf     | CGGAGGACAAAAACCCAGGAC    | GAACATCCATGGGCACCAAA      |
| Ki67      | CTGCCTGCGAAGAGAGCATC     | AGCTCCACTTCGCCTTTTGG      |
| PCNA      | ACCTGCAGAGCATGGACTCG     | GCAGCGGTATGTGTCGAAGC      |
