# Supplementary material
Source: PubMed Central journal article supplement (PMC2940473)
Supplement: me.2010-0082_2.pdf [file me.2010-0082_2.pdf]

Supplemental Table 2. Human quantitative RT-PCR primers.

|           | <b>Forward Primer</b>     | <b>Reverse Primer</b>     |
|-----------|---------------------------|---------------------------|
| Cyclin A1 | AGCACCCCTGCTCGTCACTTG     | CGGTCCCTCCCAGCTGAGATAC    |
| Cyclin A2 | TGCTGGAGCTGCCTTTCATT      | TGAAGGTCCATGAGACAAGGCT    |
| Cyclin B1 | TTTGCACTTCCTTCGGAGAGC     | AAGGAGGAAAGTGCACCATGTC    |
| Cyclin B2 | CTCTGTACATGTGCGTTGGCA     | TTGGAAGCCAAGAGCAGAGC      |
| Cyclin B3 | CAAAATCCCTGCCTTGGATATG    | TGCATGCTTAGCCCTGTGG       |
| Cyclin D1 | GCTGGCCATGAACTACCTGG      | ATCTTAGAGGCCACGAACATGC    |
| Cyclin D2 | GCCTGCCAAATTTTGATCCTTC    | CCCGCATGGAGTTTAATTATGC    |
| Cyclin D3 | CCATGTCTGCATTCGGTGG       | AATTCTGTCCCATCAGCCTGG     |
| Cyclin E1 | TACACCAGCCACCTCCAGACAC    | CCTCCACAGCTTCAAGCTTTTG    |
| Cyclin E2 | CCCAAGAAGCCCAGATAATCC     | AATACAGGTGGCCAACAATCC     |
| Cdk1      | ACCAGGAAGCCTAGCATCCC      | GATTCAGTGCCATTTTGCCAG     |
| Cdk2      | TGGATGCCTCTGCTCTCACTG     | GAGGACCCGATGAGAATGGC      |
| Cdk4      | CAGATGGCACTTACACCCGTG     | CAGCCAACACTCCACATGTCC     |
| Cdk6      | GATGACCAACATCCCCACACC     | AGAGCACCATGTGGACAAGCC     |
| FoxM1     | AGGGTGGGAACAACAAAGGCAATG  | TTACACGGACCACCCTGCAAAGAT  |
| Cks1b     | TTGAGTAGAGCCACCACCACATA   | TCAGATGCTTCCCTCCATCTGCCAA |
| Skp2      | GCAGCTGTTCCAGACTGGATG     | GGTGATGGTCTCTGACACATGC    |
| KIS       | TGCCAGTAAAGCAGTGGTGAATGC  | TTAGCACTGGAGTGGGAAGCATGA  |
| Cks2      | GCTCTTCGCGCTCTCGTTTCATTT  | ACTCTGTTGGACACCAAGTCTCCT  |
| Cdc25a    | ACCTGTGACAGCCACTTTGTCTGA  | GCTTGCATCGGTTGTCAAGGTTTG  |
| Cdc25b    | TGTCACGATGAGATCGAGAACC    | TCTTGGTGCTTTCCGCTACTG     |
| Cdc25c    | AGGACCACAAGACTGAGTTGCTGA  | TGTCCTTACCAGAAGGGCAATCT   |
| Survivin  | AGCACCTGAAAGCTTCCCTCGACAT | ATTCACAACCCTTCCCAGACTCCA  |
| Aurkb     | GAGGAAGACAATGTGTGGCACC    | GCAAAGCACTCCAATGCACC      |
| Cdea8     | ACCCAGGTTTGACTCAAGGGTCTT  | AAGTCACTGGCCAATAATCGCAGG  |
| Plk1      | AACGACTTCGTGTTTCGTGGTGTG  | GGTACTGGCAGCCAAGCACAAATTT |
| Cdc20     | ATGCGCCAGAGGGTTATCAGAACA  | CATTTCCGATTTTCAGGCGCATCCA |
| Cdea2     | TGATTCGTTTCATTGCTCGGCAGC  | TGAGAATTCCAGACAGCCGGTCAT  |
| Kif20a    | AGACCCTTGTTCTACAAGCACCCA  | TTGAAGAAGGATGCCTGTCCCCT   |
| Nek2      | TTAGCCAGAAAGAACTCGCTGGGA  | TTGCTCGTCTGCAACCAAATCTGC  |
| Cenpa     | AAGACCACTTTGAGCAGTTGCCTG  | ATGCTGCCACTAATGGTGAGGCTA  |
| Cenpb     | CATCCAGGAGGTGGAGGAGAATCCG | CTCGAGCTTGTCGTAGGGAGACAGC |
| Cenpe     | TAACACGGATGCTGGTGACCTCTT  | TGCCAAGGCACCAAGTAACTCTTC  |
| Cenpf     | ACGGAAGGTAAGTGGTTGAGCCA   | GAGTTGCCATGGTTGTTCTTCGCA  |
| Ki67      | TGTGCCTGCTCGACCCTA        | ATAGCGATGTGACATGTGCTT     |
| PCNA      | GGCACTCAAGGACCTCATCAAC    | GTGAGCTGCACCAAAGAGACG     |
