# Supplementary material
Source: PubMed Central journal article supplement (PMC2940473)
Supplement: me.2010-0082_3.pdf [file me.2010-0082_3.pdf]

Supplemental Table 3. Antibodies and dilutions for western blots.

|                   | <b>Company</b>    | <b>Catalog Number</b> | <b>Dilution</b> |
|-------------------|-------------------|-----------------------|-----------------|
| FoxM1             | Santa Cruz        | sc-500                | 1:200           |
| Cyclin A          | Sigma             | C-4710                | 1:500           |
| Cyclin B          | Cell Signaling    | 4135                  | 1:500           |
| Cyclin D1 (mouse) | Neo Markers       | MS-210                | 1:500           |
| Cyclin D1 (human) | Thermo Scientific | 9104                  | 1:500           |
| Cyclin D2         | Sigma             | C-7339                | 1:500           |
| Cyclin D2         | Santa Cruz        | sc-53637              | 1:500           |
| Cyclin D3         | Cell Signaling    | 2936                  | 1:1000          |
| Cyclin E          | Santa Cruz        | sc-20684              | 1:1000          |
| Cdk 1             | Cell Signaling    | 9112                  | 1:500           |
| Cdk 2             | Cell Signaling    | 2546                  | 1:500           |
| Cdk 4             | Santa Cruz        | sc-260-G              | 1:200           |
| Cdk 6             | Cell Signaling    | 3136                  | 1:1000          |
| p27kip1           | Cell Signaling    | 2552                  | 1:1000          |
| Gapdh             | Chemicon          | MAB374                | 1:1000          |
| $\beta$ -tubulin  | Santa Cruz        | sc-9104               | 1:500           |
