# Supplementary material
Source: PubMed Central journal article supplement (PMC2940473)
Supplement: me.2010-0082_4.pdf [file me.2010-0082_4.pdf]

Supplemental Table 4. BTBR quantitative RT-PCR data. Folds are AdCMV-*FOXM1b* versus AdCMV- $\beta$ -gal treatments (N=4).

|           | <b>Fold</b> | <b>Standard Error</b> | <b>p-value</b> |
|-----------|-------------|-----------------------|----------------|
| Cyclin A2 | 7.41        | 0.42                  | 0.0001         |
| Cyclin B1 | 4.21        | 0.73                  | 0.0041         |
| Cyclin B2 | 3.70        | 1.30                  | 0.1173         |
| Cyclin D1 | 0.92        | 0.12                  | 0.4884         |
| Cyclin D2 | 0.77        | 0.07                  | 0.0612         |
| Cyclin D3 | 1.19        | 0.19                  | 0.4904         |
| Cyclin E1 | 14.23       | 2.53                  | 0.0008         |
| Cyclin E2 | 5.63        | 0.50                  | 0.0004         |
| Cdk1      | 3.62        | 0.54                  | 0.0041         |
| Cdk2      | 5.34        | 1.72                  | 0.0193         |
| Cdk4      | 1.15        | 0.21                  | 0.6215         |
| Cdk6      | 1.43        | 0.30                  | 0.2712         |
| p21       | 1.47        | 0.40                  | 0.7383         |
| p27       | 1.34        | 0.45                  | 0.7640         |
| p57       | 1.42        | 0.44                  | 0.5989         |
| p15       | 1.09        | 0.39                  | 0.8434         |
| p16       | 4.19        | 1.74                  | 0.5315         |
| p18       | 1.13        | 0.09                  | 0.2374         |
| p19       | 1.80        | 0.77                  | 0.6712         |
| Skp2      | 2.18        | 0.35                  | 0.0200         |
| KIS       | 0.74        | 0.12                  | 0.1288         |
| Cks1b     | 2.04        | 0.33                  | 0.0269         |
| Cdc25a    | 1.34        | 0.20                  | 0.2327         |
| PCNA      | 2.62        | 0.39                  | 0.0144         |
| Cdc25b    | 1.43        | 0.19                  | 0.1334         |
| Cdc25c    | 20.72       | 10.32                 | 0.0067         |
| Cks2      | 14.07       | 3.04                  | 0.0014         |
| Birc5     | 29.34       | 8.67                  | 0.0066         |
| Aurkb     | 14.73       | 6.27                  | 0.0157         |
| Plk1      | 5.37        | 1.14                  | 0.0039         |
| Cdca8     | 11.75       | 1.81                  | 0.0005         |
| Cenpa     | 1.24        | 0.37                  | 0.7631         |
| Cenpb     | 0.96        | 0.15                  | 0.6362         |
| Cenpe     | 5.74        | 2.25                  | 0.0276         |
| Cenpf     | 6.17        | 1.98                  | 0.0373         |
| Cdc20     | 7.53        | 1.61                  | 0.0023         |
| Cdca2     | 3.92        | 0.75                  | 0.0075         |
| Nek2      | 11.66       | 3.38                  | 0.0035         |
| Kif20a    | 4.49        | 0.30                  | 0.0002         |
| Mki67     | 5.11        | 0.45                  | 0.0004         |
