# Supplementary material
Source: PubMed Central journal article supplement (PMC2940473)
Supplement: me.2010-0082_5.pdf [file me.2010-0082_5.pdf]

Supplemental Table 5. Human quantitative RT-PCR data. Folds are AdCMV-*FOXM1b* versus AdCMV- $\beta$ -gal treatments (N=4-5).

|           | <b>Fold</b> | <b>Standard Error</b> | <b>p-value</b> |
|-----------|-------------|-----------------------|----------------|
| Cyclin A1 | 2.84        | 0.66                  | 0.0213         |
| Cyclin A2 | 3.22        | 0.97                  | 0.0392         |
| Cyclin B1 | 2.43        | 0.51                  | 0.0215         |
| Cyclin B2 | 2.48        | 0.54                  | 0.0346         |
| Cyclin D1 | 1.04        | 0.20                  | 0.9131         |
| Cyclin D2 | 0.78        | 0.11                  | 0.1369         |
| Cyclin D3 | 0.89        | 0.14                  | 0.4023         |
| Cyclin E1 | 5.68        | 1.58                  | 0.0170         |
| Cyclin E2 | 1.97        | 0.24                  | 0.0115         |
| Cdk1      | 6.14        | 1.90                  | 0.0210         |
| Cdk2      | 1.85        | 0.28                  | 0.0235         |
| Cdk4      | 0.89        | 0.14                  | 0.4176         |
| Cdk6      | 0.90        | 0.13                  | 0.4343         |
| p21       | 0.96        | 0.33                  | 0.5733         |
| p27       | 0.85        | 0.12                  | 0.2851         |
| p57       | 0.93        | 0.31                  | 0.5134         |
| p15       | 0.89        | 0.24                  | 0.4450         |
| p16       | 0.84        | 0.14                  | 0.3158         |
| p18       | 1.42        | 0.32                  | 0.2563         |
| p19       | 1.46        | 0.19                  | 0.0787         |
| Skp2      | 0.91        | 0.12                  | 0.4220         |
| KIS       | 0.99        | 0.16                  | 0.7695         |
| Cks1b     | 1.41        | 0.10                  | 0.0140         |
| Cdc25a    | 3.89        | 1.03                  | 0.0136         |
| PCNA      | 2.35        | 0.43                  | 0.0262         |
| Cdc25b    | 2.02        | 0.37                  | 0.0455         |
| Cdc25c    | 15.07       | 8.62                  | 0.0178         |
| Cks2      | 4.30        | 0.84                  | 0.0068         |
| birc5     | 2.97        | 0.78                  | 0.0408         |
| Aurkb     | 4.85        | 1.82                  | 0.0210         |
| Plk1      | 2.28        | 0.55                  | 0.0452         |
| Cdca8     | 3.22        | 0.31                  | 0.0015         |
| Cenpa     | 1.76        | 0.74                  | 0.0451         |
| Cenpb     | 0.98        | 0.12                  | 0.7472         |
| Cenpe     | 6.22        | 1.48                  | 0.0065         |
| Cenpf     | 2.66        | 0.69                  | 0.0264         |
| Cdc20     | 4.40        | 1.16                  | 0.0126         |
| Cdca2     | 3.00        | 0.94                  | 0.0451         |
| Nek2      | 3.51        | 0.74                  | 0.0160         |
| Kif20a    | 3.28        | 0.37                  | 0.0023         |
| Mki67     | 1.55        | 0.28                  | 0.1958         |
