# Supplementary material
Source: PubMed Central journal article supplement (PMC2940473)
Supplement: me.2010-0082_6.pdf [file me.2010-0082_6.pdf]

Supplemental Table 6. Human islet obesity quantitative RT-PCR analysis. Data was analyzed using *FOXMI*, BMI, age, and sex as covariate adjustments; association p-values are shown. Data was also analyzed comparing obese (BMI>30) to non-obese (BMI<30) human islet donors; folds and p-values are shown. Significant values are displayed in bold.

|           | FoxM1<br>(p-value) | BMI<br>(p-value) | Age<br>(p-value) | Sex<br>(p-value) | BMI>30 vs.<br>BMI<30<br>(Fold) | BMI>30 vs.<br>BMI<30<br>(p-value) |
|-----------|--------------------|------------------|------------------|------------------|--------------------------------|-----------------------------------|
| FoxM1     |                    | <b>0.0112</b>    | 0.8913           | 0.3297           | 7.44                           | <b>0.0120</b>                     |
| Cyclin A1 | 0.6040             | <b>0.0090</b>    | 0.8790           | 0.8979           | 2.45                           | <b>0.0615</b>                     |
| Cyclin A2 | <b>0.0065</b>      | 0.3486           | 0.8997           | 0.8266           | 3.28                           | <b>0.0018</b>                     |
| Cyclin B1 | 0.2412             | 0.5142           | 0.5708           | 0.2930           | 1.38                           | 0.3183                            |
| Cyclin B2 | <b>0.0001</b>      | 0.1582           | 0.9946           | 0.1686           | 2.29                           | <b>0.0235</b>                     |
| Cyclin E1 | 0.1180             | 0.3608           | 0.8791           | 0.1875           | 1.59                           | 0.2310                            |
| Cyclin E2 | <b>0.0381</b>      | 0.4772           | 0.7155           | <b>0.0165</b>    | 0.43                           | 0.3293                            |
| Cdk1      | <b>0.0157</b>      | 0.8234           | 0.8711           | 0.5340           | 2.16                           | <b>0.0245</b>                     |
| Cdk2      | 0.7234             | 0.4471           | 0.6734           | 0.5169           | 0.91                           | 0.5221                            |
| Skp2      | 0.0837             | 0.5875           | 0.4490           | <b>0.0492</b>    | 1.51                           | 0.1040                            |
| KIS       | 0.0920             | 0.4550           | 0.9645           | 0.6401           | 1.58                           | <b>0.0204</b>                     |
| Cks1b     | <b>0.0195</b>      | 0.4197           | 0.2755           | 0.6324           | 1.71                           | 0.1124                            |
| Cdc25a    | 0.5902             | 0.6500           | 0.8137           | <b>0.0159</b>    | 0.86                           | 0.5997                            |
| PCNA      | 0.9318             | 0.3145           | 0.8337           | 0.3537           | 1.21                           | 0.3570                            |
| Cdc25b    | 0.1178             | 0.7954           | 0.7806           | 0.8726           | 1.87                           | 0.0519                            |
| Cdc25c    | 0.2802             | 0.1283           | 0.8478           | 0.4856           | 3.72                           | 0.1083                            |
| Cks2      | 0.5835             | 0.4827           | 0.7872           | 0.5727           | 1.45                           | 0.1984                            |
| Birc5     | 0.1546             | 0.1319           | 0.1023           | 0.2053           | 3.96                           | 0.1140                            |
| Aurkb     | <b>0.0239</b>      | 0.0740           | 0.3194           | 0.1071           | 5.69                           | <b>0.0188</b>                     |
| Plk1      | <b>0.0043</b>      | <b>0.0240</b>    | 0.2197           | 0.1797           | 3.84                           | <b>0.0330</b>                     |
| Cdca8     | 0.8044             | 0.0610           | 0.0767           | 0.0644           | 2.37                           | <b>0.0053</b>                     |
| Cenpa     | <b>0.0009</b>      | <b>0.0194</b>    | 0.3524           | 0.5684           | 3.76                           | <b>0.0218</b>                     |
| Cenpb     | <b>0.0197</b>      | 0.3674           | 0.7635           | 0.3367           | 2.08                           | 0.2958                            |
| Cenpe     | <b>0.0081</b>      | 0.9203           | 0.2616           | 0.3534           | 2.67                           | <b>0.0152</b>                     |
| Cenpf     | <b>0.0009</b>      | 0.7018           | 0.4215           | 0.7999           | 3.67                           | <b>0.0045</b>                     |
| Cdc20     | <b>0.0030</b>      | 0.3126           | 0.2502           | 0.2696           | 2.38                           | 0.1077                            |
| Cdca2     | <b>0.0009</b>      | 0.9709           | <b>0.0330</b>    | 0.2744           | 2.48                           | <b>0.0025</b>                     |
| Nek2      | 0.0989             | <b>0.0347</b>    | 0.9628           | 0.8264           | 4.59                           | 0.0612                            |
| Kif20a    | 0.3499             | 0.0987           | 0.2046           | 0.2868           | 3.68                           | <b>0.0127</b>                     |
| Ki67      | 0.2264             | 0.9417           | 0.9406           | 0.6192           | 3.80                           | <b>0.0279</b>                     |
