# Supplementary material
Source: PubMed Central journal article supplement (PMC2940473)

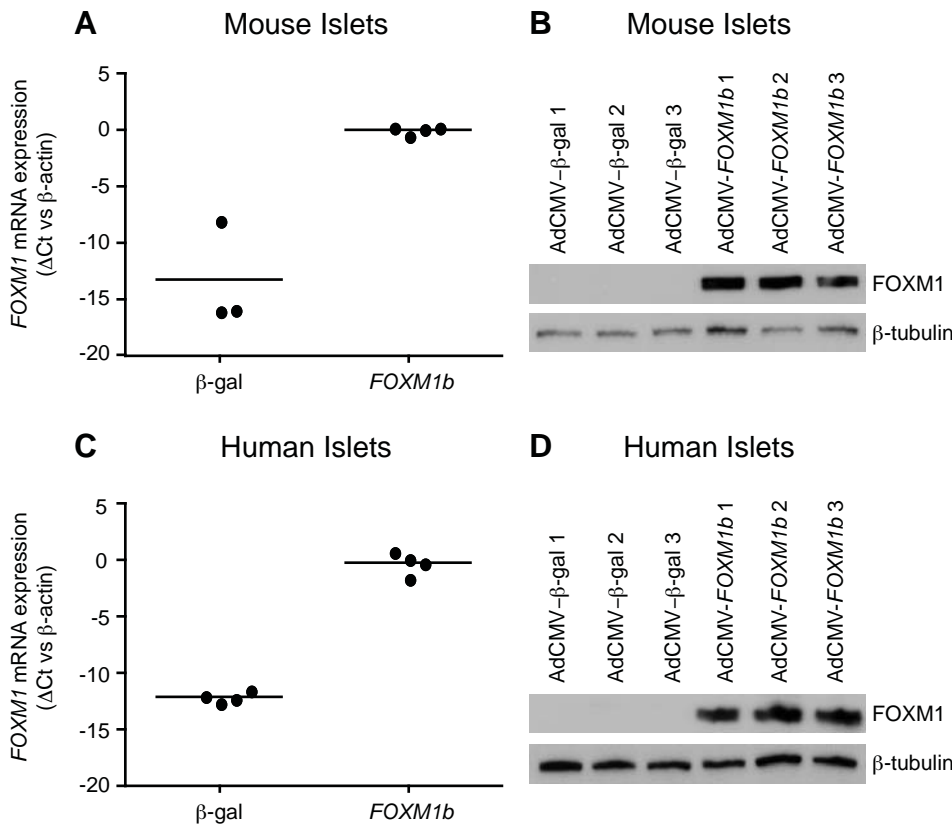

Supplement: me.2010-0082_7.pdf [file me.2010-0082_7.pdf]

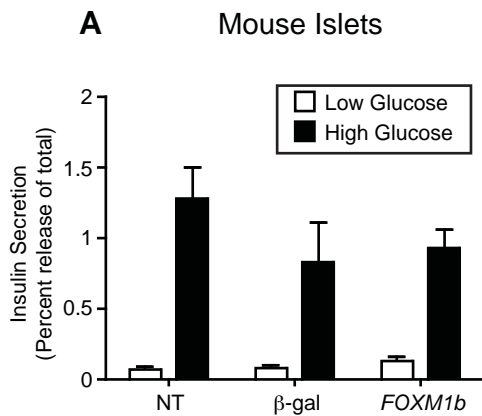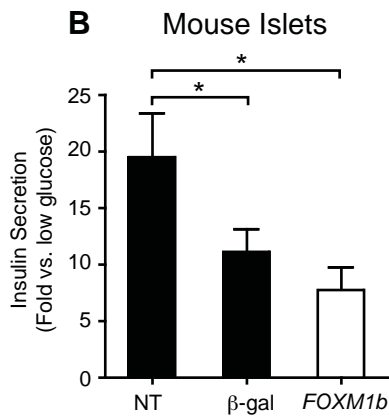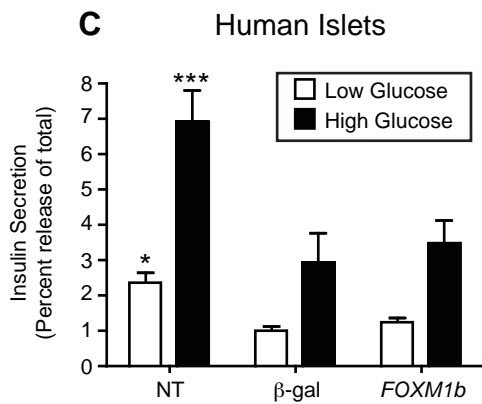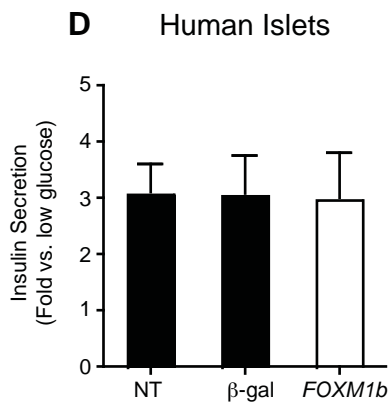

Supplement: me.2010-0082_8.pdf [file me.2010-0082_8.pdf]
